# Supplementary material for: Role of the central nervous system and adipose tissue BDNF/TrkB axes in metabolic regulation
Source: PubMed Central journal article supplement (PMC5514989; doi:10.1038/npjamd.2015.9), 2015-10-29
Supplement: npjamd20159-s1.pdf [file npjamd20159-s1.pdf]

## Supplementary Figure S1

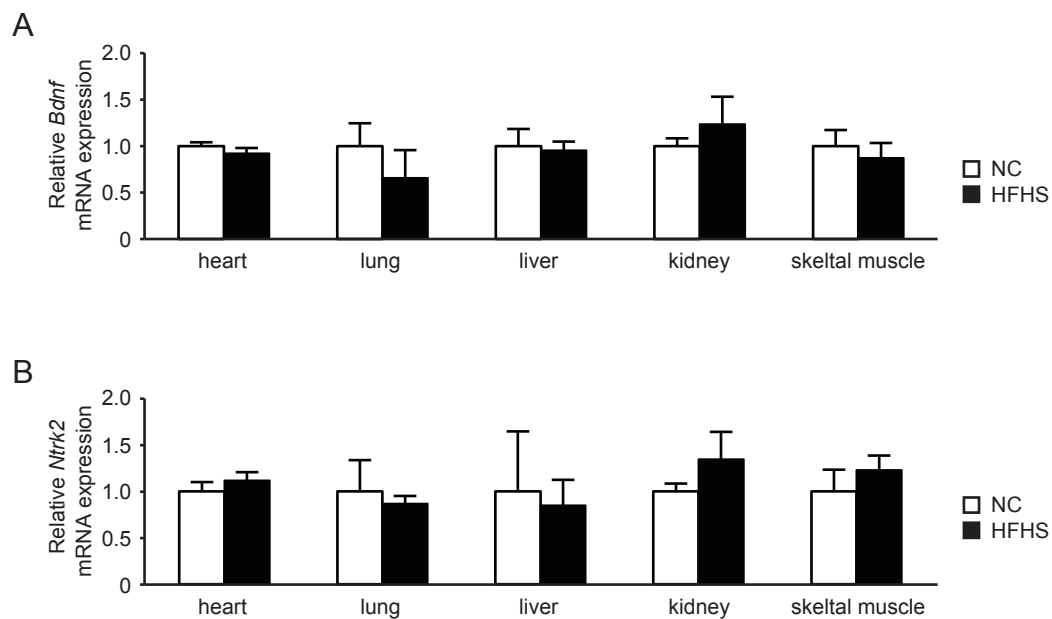

Supplementary Figure S1. *Bdnf* and *Ntrk2* expression in the peripheral tissues of mice with dietary obesity. (A, B) Expression of *Bdnf* (A) and *Ntrk2* (B) in several peripheral tissues assessed by real-time PCR in 16-week-old mice fed normal chow (NC) or a high-fat/high-sucrose (HFHS) diet.

Supplementary Figure S2

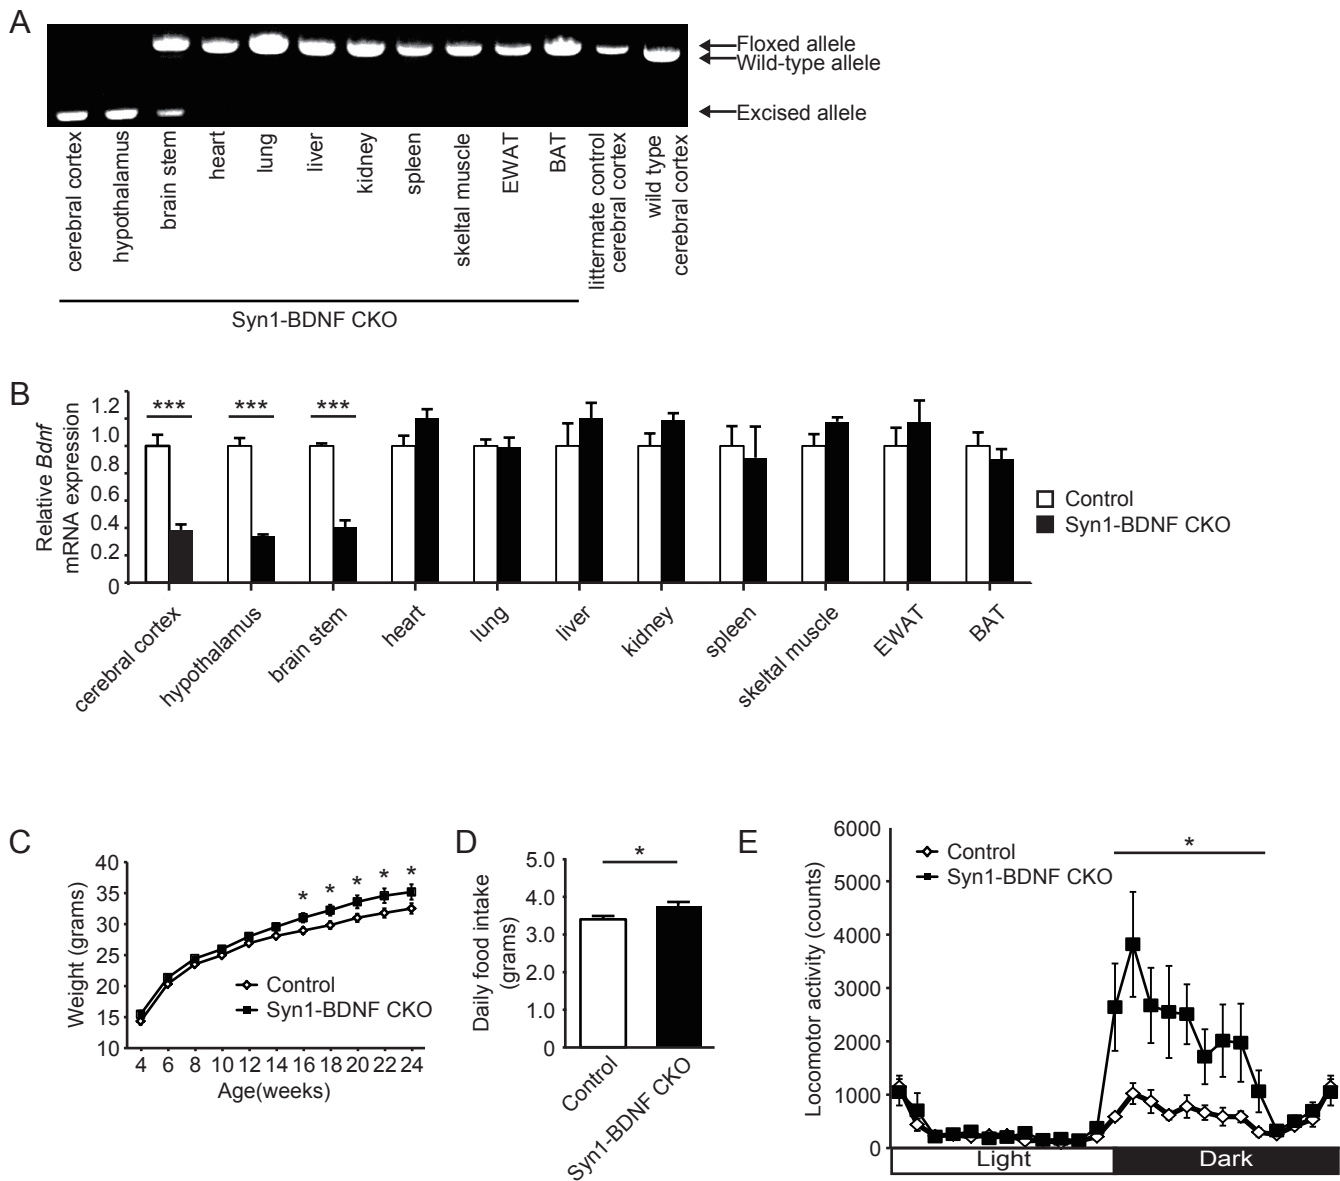

Supplementary Figure S2. Neuronal *Bdnf* deficiency leads to similar phenotypes to those of *Fabp4*-*BDNF*/*TrkB* CKO mice.

(A) PCR analysis of genomic DNA isolated from various tissues of Syn1-BDNF CKO mice and from the cerebral cortex of their littermate controls and wild-type mice. Littermates were homozygous for the floxed *Bdnf* allele, but did not carry Cre recombinase.

(B) Real-time PCR analysis of *Bdnf* expression in various tissues of Syn1-BDNF CKO mice and their littermate controls (Control).  $n = 5$ .  $***p < 0.001$ .

(C) Body weight of Syn1-BDNF CKO mice and their littermate controls (Control).  $n = 22-25$ .  $*p < 0.05$ .

(D) Food intake of Syn1-BDNF CKO mice and their littermate controls (Control) at 8–12 weeks of age.  $n = 12-14$ .  $*p < 0.05$ .

(E) Locomotor activity of Syn1-BDNF CKO mice and littermate controls (Control) at 14–16 weeks of age.  $n = 8$ .  $*p < 0.05$ . Data are shown as the mean  $\pm$  SEM.

### Supplementary Figure S3

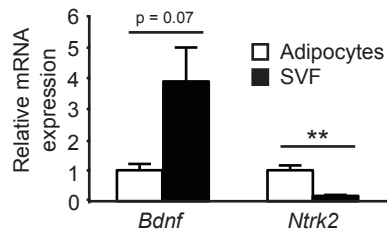

Supplementary Figure S3. *Bdnf* expression was elevated in the stromal vascular fraction, while expression of *Ntrk2* was increased in adipocytes. Expression of *Bdnf* and *Ntrk2* in adipocytes and the stromal vascular fraction (SVF) was assessed by real-time PCR.  $n = 3-5$ . \*\* $p < 0.01$ . Data are shown as the mean  $\pm$  SEM.

## Supplementary Figure S4

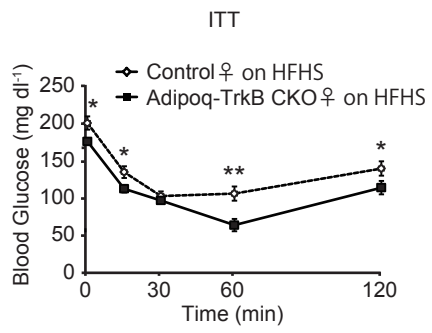

Supplementary Figure S4. Blood glucose levels in Adipoq-TrkB CKO mice and their littermate controls during ITT

n = 12-13. \*p < 0.05, \*\*p < 0.01. Data are shown as the mean ± SEM.
